# Supplementary material for: Source apportionment of organotin pollution in different types of drinking water from megacity communities using multiple receptor models: a case study in Shanghai, China
Source: Royal Society of Chemistry journal article supplement (doi:10.1039/d4ew00843j), 2025-01-01
Supplement: d4ew00843j1.pdf [file d4ew00843j1.pdf]

## Supporting Information

### Source Apportionment of Organotin Pollution in Different Types of Drinking Water from Megacity Communities Using Multiple Receptor Models: A Case Study in Shanghai, China

Qinghui Huang <sup>a,b</sup>, Ying Meng <sup>a</sup>, Yang Lu <sup>a</sup>, Zhiliang Zhu <sup>a,b,\*</sup>, Yanling Qiu <sup>a,b</sup> and Ake Bergman <sup>b,c,d</sup>

<sup>a</sup> Key Laboratory of Yangtze River Water Environment of the Ministry of Education, College of Environmental Science and Engineering, Tongji University, Shanghai 200092, China

<sup>b</sup> Shanghai Institute of Pollution Control and Ecological Security, Shanghai 200092, China.

<sup>c</sup> Department of Environmental Science (ACES), Stockholm University, Stockholm 106 91, Sweden

<sup>d</sup> Department of Science and Technology, Örebro University, SE-701 82 Örebro, Sweden

\*Corresponding author:

Zhiliang Zhu, E-mail: [zzl@tongji.edu.cn](mailto:zzl@tongji.edu.cn)

11 pages, including 6 Tables and 3 Figures.

**S1. Reagents, standards and experimental materials of organotin compounds (OTCs).**

**S2. Instrumental methods of organotin compounds (OTCs).**

### **S3. Recovery experiment of organotin compounds (OTCs).**

**Tables S1-S6**

**Figures S1-S3**

### **S1. Reagents, standards and experimental materials of organotin compounds (OTCs).**

Monomethyltin (MMT, 99.9%) was purchased from HAYASHI PURE CHEMICAL IND, LTD (Osaka, Japan). Dimethyltin (DMT, 99.9%), Monobutyltin (MBT, 95%), Dibutyltin (DBT, 97.2%), Tributyltin (TBT, 95%), Tetrabutyltin (TeBT, 96%), Triphenyltin (TPhT, 96%), and Diphenyltin (DPhT, 97%) were all obtained from Dr. Ehrenstorfer (Augsburg, Germany). Specific information on these OTCs is presented in Table S2. Methanol (CNW Technologies GmbH, Germany, chromatographic grade, 99.8%), Hexane (CNW Technologies GmbH, Germany, chromatographic grade, 95%), Sodium tetraethylborate (NaBEt<sub>4</sub>, CNW Technologies GmbH, Germany, 98%), acetic acid (Sinopharm Chemical Reagent Co., Ltd., China, analytical grade), sodium acetate (Sinopharm Chemical Reagent Co., Ltd., China, analytical grade), and sodium hydroxide (Sinopharm Chemical Reagent Co., Ltd., China, analytical grade) were used. Milli - Q (18.2 M $\Omega$ ·cm) water was used for experiments (Beijing Purkinje General Instrument Co., Ltd., China).

Preparation of Sodium Tetraethylborate Solution (1% w/v): Add 2 g of KOH to 97 mL of deionized water. Place this solution in a refrigerator for 30 - 90 minutes until ice crystals form. Subsequently, add 1 g of NaBEt<sub>4</sub> to the KOH solution and shake it

thoroughly to ensure homogeneity. Then, dispense equal - volume aliquots of the solution into clean Teflon vials (2 mL) and keep frozen.

Preparation of Acetic Acid/Sodium Acetate Buffer Solution (1 mol/L): Dissolve 82 g of sodium acetate in 1 L of deionized water. Then, slowly add acetic acid to the solution until the pH is stabilized at 4.5.

Preparation of Elution Solution: Add 10.79 g of solid ammonium chloride to 75 mL of deionized water. Make up the volume to 250 mL with methanol and mix well. At this stage, the concentration of ammonium chloride in the solution is 0.8 mol/L, and the solvent is a mixture of methanol/water = 7/3. Take the prepared solution and add glacial acetic acid to it, such that the glacial acetic acid / ammonium chloride solution is 10/90.

## **S2. Instrumental methods of organotin compounds (OTCs).**

An Agilent GC-MS (7890-5975) with a DB-5MS column (30m × 0.25 mm × 0.25 μm) was used for analysis. The injector temperature was 280 °C, the column temperature was 30 °C, the injection volume was 1 μL under the non-split mode with a constant flow rate of 1 mL/min. The optimal oven temperature program was starting at 30 °C for 2 min, rising at 10 °C min<sup>-1</sup> to 60 °C and then rising at 20 °C min<sup>-1</sup> to 110 °C, finally to 280 °C at 40 °C min<sup>-1</sup> for 3 min. The EI (70 V) ion source was used at 260 °C, with a solvent delay of 4 min. The mass spectrometry interface temperature was 300 °C, and the carrier gas was high-purity helium (99.999%).

## **S3. Recovery experiment of organotin compounds (OTCs).**

Quality control and quality assurance were conducted using the spiked recoveries ( $n = 3$ ) after adding standard substances at low (10 ng Sn/L), medium (70 ng Sn/L), and high concentrations (100 ng Sn/L) to blank water samples. The recovery results are presented in Table S4. For blank water samples, the spiked recoveries at low, medium, and high concentrations were all within the range of 70% - 130%, and the relative standard deviations (RSDs) were all less than 10%, meeting the experimental requirements.

Meanwhile, considering the potential matrix differences between actual water samples and blank water samples, which may lead to matrix interference during practical applications, 0.5 mL of an organotin mixed standard substance with a known concentration (100  $\mu\text{g Sn/L}$ ) was added to three groups of tap water samples from Tongji University to calculate the matrix recoveries. The measured concentrations of each substance with matrix spiking ( $n = 3$ ) were  $79 \pm 2 \mu\text{g DMT/L}$ ,  $74 \pm 4 \mu\text{g MMT/L}$ ,  $88 \pm 2 \mu\text{g MBT/L}$ ,  $96 \pm 3 \mu\text{g DBT/L}$ ,  $97 \pm 7 \mu\text{g TBT/L}$ ,  $106 \pm 4 \mu\text{g DPhT/L}$ , and  $104 \pm 2 \mu\text{g TPhT/L}$ , respectively. All these values fell within the reference concentration range, and the recovery rates were basically consistent with those of the blank water samples (Table S5). This indicates that this analytical and detection method can accurately quantify organotin substances in actual water samples.

Table S1. Details of tap water (TW), water vending machine (WVM), and water boiling machine (WBM HP & HT) sampling information.

| Site No.        | Sample | Site <sup>a</sup> |          | Site No.       | Sample | Site <sup>a</sup> | Brand <sup>b</sup> |
|-----------------|--------|-------------------|----------|----------------|--------|-------------------|--------------------|
| FM-TW-ek        | TW     | FM                | Hospital | FM-WVM-EJ      | WVM    | FM                | EJ                 |
| FM-TW-hl        | TW     | FM                | School   | FM-WVM-GH-1    | WVM    | FM                | GH                 |
| FM-TW-hs        | TW     | FM                | School   | FM-WVM-GH-2    | WVM    | FM                | GH                 |
| FM-TW-sj(m)     | TW     | FM                | School   | FM-WVM-HY      | WVM    | FM                | HY                 |
| FM-TW-ss        | TW     | FM                | School   | FM-WVM-QJ      | WVM    | FM                | QJ                 |
| FM-WBM HP-HL    | WBM HP | FM                | School   | FM-WVM-QM-1    | WVM    | FM                | QM                 |
| FM-WBM HP-HS    | WBM HP | FM                | School   | FM-WVM-QM-2    | WVM    | FM                | QM                 |
| FM-WBM HP-SJ(M) | WBM HP | FM                | School   | FM-WVM-YQ-1    | WVM    | FM                | YQ                 |
| FM-WBM HP-SS    | WBM HP | FM                | School   | FM-WVM-YQ-2    | WVM    | FM                | YQ                 |
| FM-WBM HT-EK    | WBM HT | FM                | Hospital | N-WVM-EJ-138   | WVM    | N                 | EJ                 |
| N-TW-ch         | TW     | N                 | Hospital | N-WVM-EJ-3338  | WVM    | N                 | EJ                 |
| N-TW-xh         | TW     | N                 | Hospital | N-WVM-HY-169   | WVM    | N                 | HY                 |
| N-WBM HP-SC     | WBM HP | N                 | School   | N-WVM-HY-395   | WVM    | N                 | HY                 |
| N-WBM HT-CH     | WBM HT | N                 | Hospital | N-WVM-QJ       | WVM    | N                 | QJ                 |
| N-WBM HT-FD(H)  | WBM HT | N                 | School   | N-WVM-QM       | WVM    | N                 | QM                 |
| N-WBM HT-GD     | WBM HT | N                 | Hospital | N-WVM-YQ-357   | WVM    | N                 | YQ                 |
| N-WBM HT-XH     | WBM HT | N                 | Hospital | N-WVM-YQ-90    | WVM    | N                 | YQ                 |
| PD-TW-df        | TW     | PD                | Hospital | N-WVM-YSK      | WVM    | N                 | YSK                |
| PD-TW-rj        | TW     | PD                | Hospital | PD-WVM-EJ-3288 | WVM    | PD                | EJ                 |
| PD-TW-sg        | TW     | PD                | Hospital | PD-WVM-GH-1155 | WVM    | PD                | GH                 |
| PD-TW-sy        | TW     | PD                | School   | PD-WVM-GH-1166 | WVM    | PD                | GH                 |
| PD-WBM HP-RJ    | WBM HP | PD                | Hospital | PD-WVM-GH-2500 | WVM    | PD                | GH                 |
| PD-WBM HP-SH    | WBM HP | PD                | School   | PD-WVM-HY-573  | WVM    | PD                | HY                 |
| PD-WBM HP-SK    | WBM HP | PD                | School   | PD-WVM-QJ      | WVM    | PD                | QJ                 |
| PD-WBM HT-DF    | WBM HT | PD                | Hospital | PD-WVM-QM      | WVM    | PD                | QM                 |
| S-TW-ly         | TW     | S                 | Hospital | PD-WVM-YQ-2851 | WVM    | PD                | YQ                 |
| S-TW-xk         | TW     | S                 | Hospital | PD-WVM-YQ-3905 | WVM    | PD                | YQ                 |
| S-WBM HP-SJ(X)  | WBM HP | S                 | School   | S-WVM-EJ-111   | WVM    | S                 | EJ                 |
| S-WBM HT-BW     | WBM HT | S                 | Hospital | S-WVM-EJ-937   | WVM    | S                 | EJ                 |
| S-WBM HT-CZ     | WBM HT | S                 | Hospital | S-WVM-HY-368   | WVM    | S                 | HY                 |
| S-WBM HT-FD(F)  | WBM HP | S                 | School   | S-WVM-HY-487   | WVM    | S                 | HY                 |
| S-WBM HT-LY     | WBM HT | S                 | Hospital | S-WVM-JB       | WVM    | S                 | JB                 |
| S-WBM HT-XK     | WBM HT | S                 | Hospital | S-WVM-QJ-240   | WVM    | S                 | QJ                 |
|                 |        |                   |          | S-WVM-QJ-550   | WVM    | S                 | QJ                 |
|                 |        |                   |          | S-WVM-QM-1501  | WVM    | S                 | QM                 |
|                 |        |                   |          | S-WVM-QM-333   | WVM    | S                 | QM                 |
|                 |        |                   |          | S-WVM-YQ-1023  | WVM    | S                 | YQ                 |

Site<sup>a</sup>: FM: Fengxian and Minhang Districts; N: North Water supply district; S: South Water supply district; PD: Pudong District. Brand<sup>b</sup>: EJ: Qing Lang; GH: Gang Hui; HY: Han Ying; JB: Jing Bo; QJ: Qi Jia; QM: Qin Mia; YQ: Yi Quan; YSK: Yi Sikai.

Table S2. Detailed information of OTCs.

| Compounds | CAS number | Chemical Formula                  | Density (g/cm <sup>3</sup> ) | Solubility (mg/cm <sup>3</sup> )    | Melting Point (°C) | Boiling Point (°C)   |
|-----------|------------|-----------------------------------|------------------------------|-------------------------------------|--------------------|----------------------|
| MMT       | 993-16-8   | MeSnCl <sub>3</sub>               | 0.99                         | n.i. <sup>a</sup>                   | 47                 | 173                  |
| DMT       | 753-73-1   | Me <sub>2</sub> SnCl <sub>2</sub> | 1.40                         | 20000 <sup>b</sup>                  | 106-108            | 188-190 <sup>d</sup> |
| MBT       | 1118-46-3  | BuSnCl <sub>3</sub>               | 1.69                         | n.i. <sup>a</sup>                   | -63                | 93/1.3 kPa           |
| DBT       | 818-08-6   | Bu <sub>2</sub> SnCl <sub>2</sub> | 1.36                         | 4-50 <sup>b</sup> ; 92 <sup>c</sup> | 39-41              | 153/1.3 kPa          |
| TBT       | 1461-22-9  | Bu <sub>3</sub> SnCl              | 1.21                         | 50 <sup>b</sup> ; 5-17 <sup>c</sup> | -16                | 172/3.3 kPa          |
| DPhT      | 1135-99-5  | Ph <sub>2</sub> SnCl <sub>2</sub> | n.i. <sup>a</sup>            | n.i. <sup>a</sup>                   | 41-43              | 333-337 <sup>d</sup> |
| TPhT      | 639-58-7   | Ph <sub>3</sub> SnCl              | n.i. <sup>a</sup>            | n.i. <sup>a</sup>                   | 103-108            | 240 <sup>d</sup>     |

Notes: All data were obtained from PubChem (PubChem) and the CompTox Chemicals Dashboard (Chemicals Dashboard).

n.i.<sup>a</sup>: no information.

<sup>b</sup> Solubility in seawater.

<sup>c</sup> Solubility in distilled water.

<sup>d</sup> at standard atmospheric pressure.

Table S3. Properties and quantitative parameters of organotin standard materials.

| Compounds | Mass (g/mol) | Retention Time (min) | Quantification ions | Quantitative ions |
|-----------|--------------|----------------------|---------------------|-------------------|
|           |              |                      | m/z                 | m/z               |
| MMT       | 220.96       | 8.78                 | 151, 179, 149       | 151               |
| DMT       | 206.93       | 12.65                | 165, 135, 193       | 165               |
| MBT       | 263.05       | 20.38                | 179, 177, 151       | 179               |
| DBT       | 291.11       | 23.63                | 151, 149, 179       | 151               |
| TBT       | 319.17       | 26.16                | 151, 207, 205       | 151               |
| DPhT      | 331.07       | 31.59                | 303, 301, 197       | 303               |
| TPhT      | 377.13       | 36.66                | 351, 349, 347       | 351               |

Table S4. Limit of detection (LOD), recoveries, relative standard deviations (RSD) and correlation coefficients of standard curves ( $R^2$ ) of OTCs performed with spiked blank water.

| Compounds | LOD<br>(ng Sn/L) | 10 ng Sn /L |      | 70 ng Sn /L |      | 100 ng Sn /L |      | $R^2$ |
|-----------|------------------|-------------|------|-------------|------|--------------|------|-------|
|           |                  | Recoveries  | RSD  | Recoveries  | RSD  | Recoveries   | RSD  |       |
| DMT       | 2.23             | 71.6%       | 7.6% | 75.6%       | 5.6% | 79.4%        | 2.4% | 0.993 |
| MMT       | 2.40             | 70.2%       | 9.4% | 73.8%       | 4.0% | 77.5%        | 5.0% | 0.996 |
| MBT       | 3.23             | 106.0%      | 8.8% | 80.8%       | 5.1% | 83.8%        | 2.1% | 0.996 |
| DBT       | 2.56             | 79.2%       | 3.4% | 92.2%       | 6.6% | 96.7%        | 4.3% | 0.996 |
| TBT       | 3.75             | 73.1%       | 6.0% | 95.9%       | 2.8% | 103.2%       | 4.6% | 0.994 |
| DPhT      | 3.68             | 125.0%      | 1.2% | 103.7%      | 3.8% | 112.7%       | 5.8% | 0.995 |
| TPhT      | 1.51             | 118.8%      | 4.7% | 112.7%      | 1.7% | 101.8%       | 6.1% | 0.998 |

Table S5. The standard recovery rate of tap water samples from Tongji University.

| Compounds | Concentration ( $\mu\text{g Sn /L}$ ) |         |         |         |                    | Recoveries |
|-----------|---------------------------------------|---------|---------|---------|--------------------|------------|
|           | Group 1                               | Group 2 | Group 3 | Average | Standard deviation |            |
| DMT       | 104                                   | 105     | 107     | 105     | 2                  | 79%        |
| MMT       | 78                                    | 74      | 70      | 74      | 4                  | 74%        |
| MBT       | 98                                    | 99      | 102     | 100     | 2                  | 88%        |
| DBT       | 93                                    | 95      | 99      | 96      | 3                  | 96%        |
| TBT       | 91                                    | 96      | 105     | 97      | 7                  | 97%        |
| DPhT      | 105                                   | 103     | 110     | 106     | 4                  | 106%       |
| TPhT      | 102                                   | 106     | 103     | 104     | 2                  | 104%       |

Table S6. The toxicity data of OTCs.

| Compounds | CAS number | Toxicity Data |       |           |                        |           |                               | TDI/( $\mu\text{g/kg}\cdot\text{d}$ ) |
|-----------|------------|---------------|-------|-----------|------------------------|-----------|-------------------------------|---------------------------------------|
|           |            | Organism      | Route | Test Type | Dose                   | Test Type | Dose                          |                                       |
| MMT       | 993-16-8   | rat           | oral  | LD50      | 1370 mg/kg             | LC50      | 600000 mg/m <sup>3</sup> /1hr | /                                     |
| DMT       | 753-73-1   | rat           | oral  | LD50      | 73900 $\mu\text{g/kg}$ | LC50      | 115 mg/m <sup>3</sup> /4hr    | /                                     |
| MBT       | 1118-46-3  | rat           | oral  | LD50      | 2140 mg/kg             | LD50      | 2140 mg/kg                    | 5.42                                  |
| DBT       | 818-08-6   | rat           | oral  | LD50      | 44900 $\mu\text{g/kg}$ | /         | /                             | 1.75                                  |
| TBT       | 1461-22-9  | rat           | oral  | LD50      | 129 mg/kg              | LD50      | 60 mg/kg                      | 0.25                                  |
| DPhT      | 1135-99-5  | rat           | oral  | LDLo      | 410 mg/kg              | /         | /                             | 3.50                                  |
| TPhT      | 639-58-7   | rat           | oral  | LD50      | 135 mg/kg              | LD50      | 18 mg/kg                      | 0.5                                   |

Notes: All data were obtained from PubChem (PubChem); TDI: tolerated daily intake

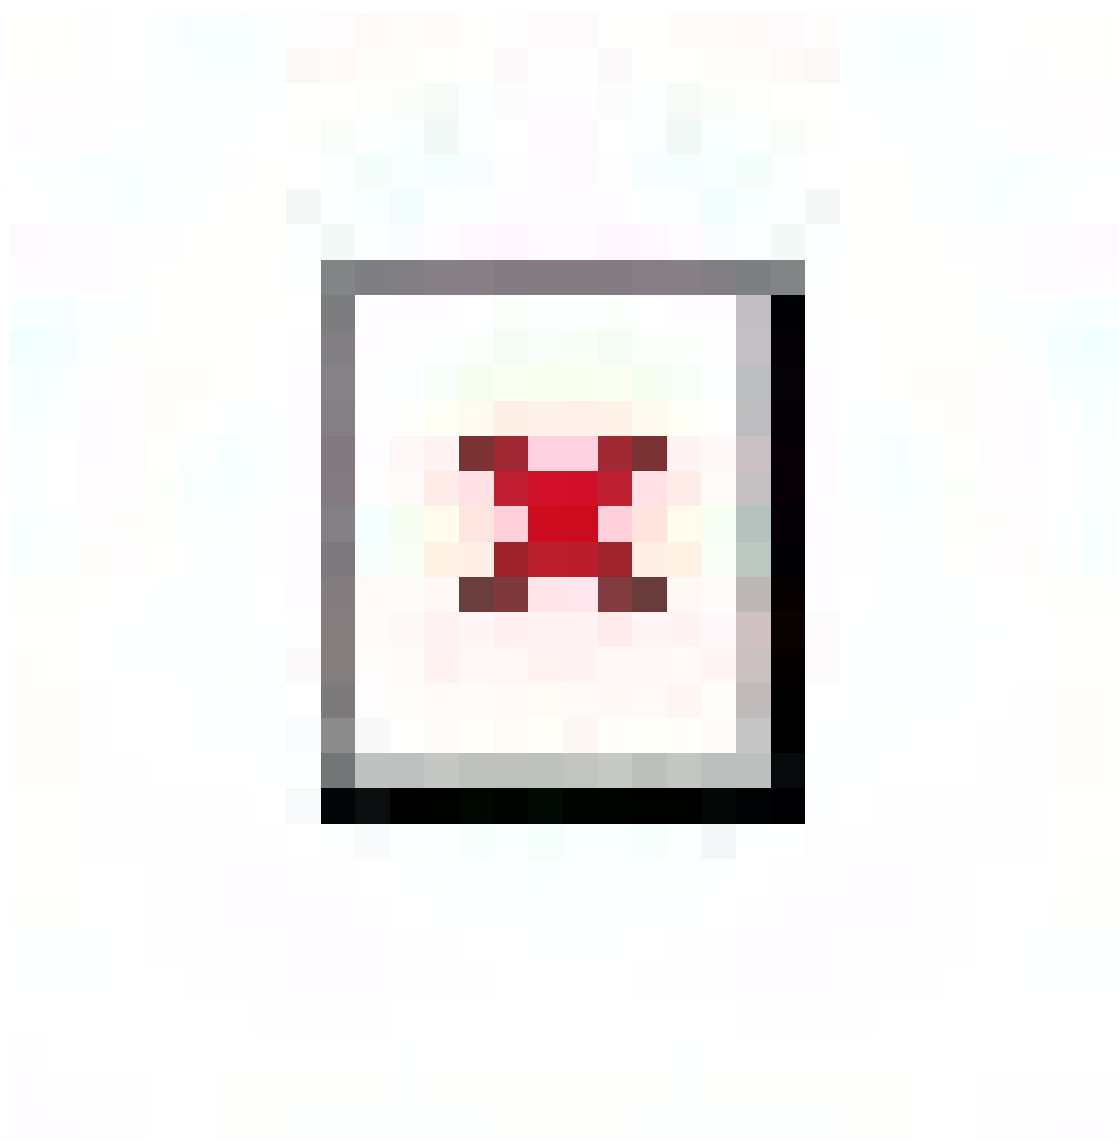

Fig. S1. Concentrations of OTCs in different drinking water samples.



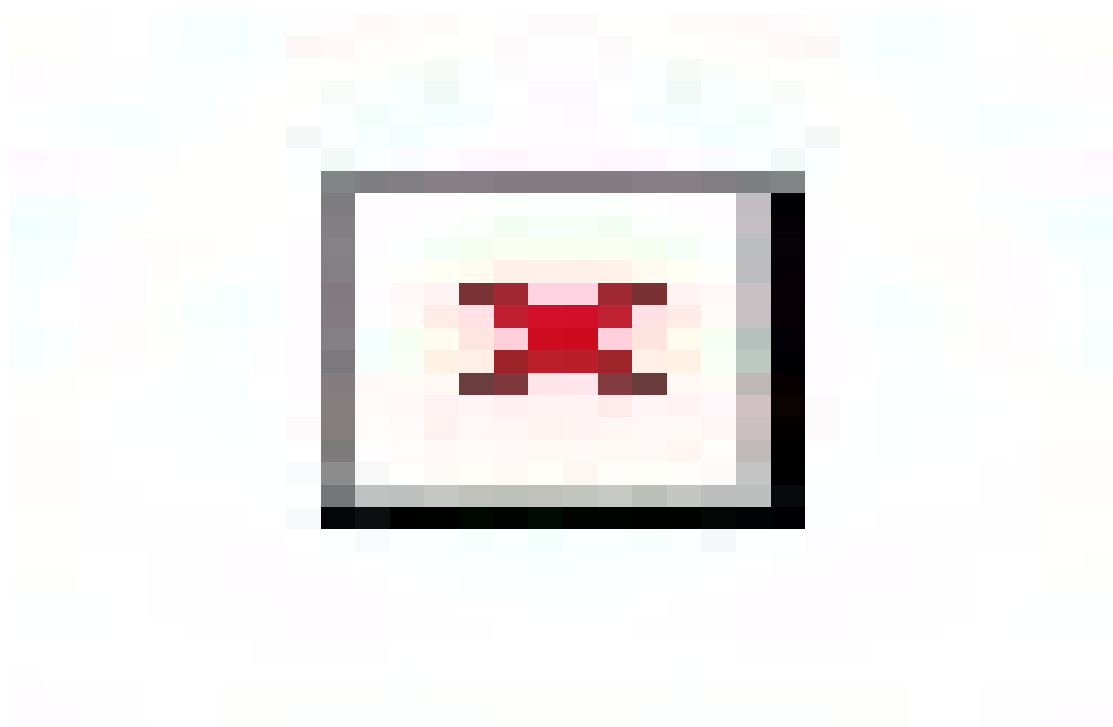

Fig. S2. Compositions of OTCs in different drinking water samples (excluding non-detected samples).

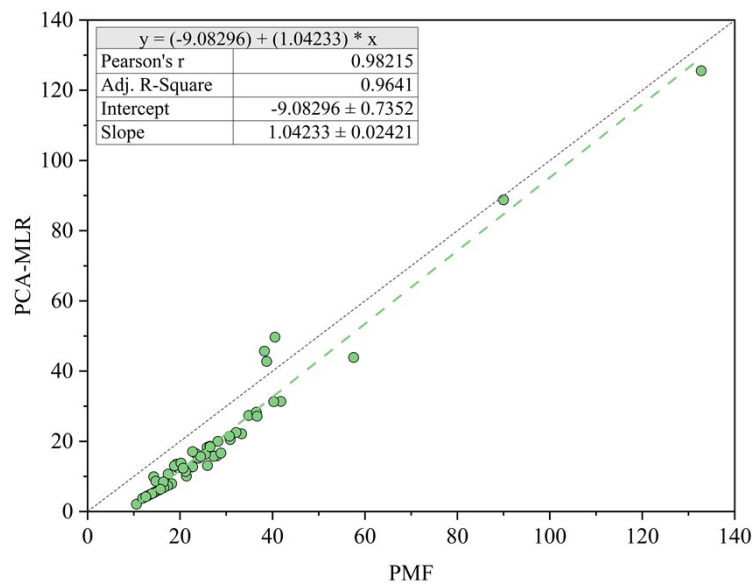

Fig. S3. Plots of fit for the predicted concentrations of PCA-MLR and PMF.

## References

1. PubChem. National Library of Medicine; National Institutes of Health. USA.gov. Available from <https://pubchem.ncbi.nlm.nih.gov/>
2. CompTox Chemicals Dashboard Help: Chemical Search. Available from <https://comptox.epa.gov/dashboard/dsstoxdb/results?search=DTXSID9020112>
